# Supplementary material for: Retrograde BMP signaling controls Drosophila behavior through regulation of a peptide hormone battery
Source: Oxford University Press journal article supplement (doi:10.1242/dev.064105), 2011-07-12
Supplement: dev064105tables1.pdf [file dev064105tables1.pdf]

**Table S1. Primer sequences for generation of UAS-peptide hormone and in situ hybridization probes**

| Gene         | Function* | Sequence (5' to 3')                                      |
|--------------|-----------|----------------------------------------------------------|
| <i>Ccap</i>  | Probe     | CGCTCCTCCAATTGCTGC<br>GGATTTCCCTGAGGCTGC                 |
|              | UAS       | AGATCTATGAGAACGTCCATGAGGATT<br>TCTAGATCATTGCTTTGCGCTCCTC |
| <i>Mip</i>   | Probe/UAS | AGATCTTATGGCTCACACTAAGACG<br>TCTAGAATTAGTTGCTGGGCAACTG   |
| <i>bursβ</i> | Probe     | GCATGTCCAGGAACTGCTCT<br>TTAATAACGCCCATAGTTGG             |
|              | UAS       | AGATCTATGCATGTCCGGAAGTCTC<br>CTCGAGTTAACGTGTGAAATCGCCACA |
| <i>bursα</i> | Probe     | TTTACGCTCGCCGGGCTTCA<br>ACCTGCTCCGCCACGAGAACAA           |

\*Probe, to amplify genomic or coding sequence (CDS) regions in order to generate sense and antisense single-stranded DNA probes for *Ccap*, *Mip*, *bursα* as well as the RNA probe for *bursβ*; UAS, to amplify CDS for each peptide hormone to generate each UAS-transgene.
