# Supplementary material for: Retrograde BMP signaling controls Drosophila behavior through regulation of a peptide hormone battery
Source: Oxford University Press journal article supplement (doi:10.1242/dev.064105), 2011-07-12
Supplement: dev064105tables3.pdf [file dev064105tables3.pdf]

**Table S3. Total number of type III boutons and axonal branch length in controls, *wit* mutants and *wit* rescue**

| Genotype                                                                             | Number of boutons                                              | Total projection length ( $\mu\text{m}$ )                     |
|--------------------------------------------------------------------------------------|----------------------------------------------------------------|---------------------------------------------------------------|
| <i>Ccap-GAL4, UAS-CD8-GFP/+; wit<sup>A12</sup>/+</i>                                 | 25.0 $\pm$ 11.4 (n=18)                                         | 470.7 $\pm$ 159.4 (n=18)                                      |
| <i>Ccap-GAL4, UAS-CD8-GFP/+; wit<sup>A12</sup>/wit<sup>B11</sup></i>                 | 12.2 $\pm$ 5.5 (n=20); <i>P</i> =0.0009*                       | 310.6 $\pm$ 104 (n=20); <i>P</i> =0.0005*                     |
| <i>Ccap-GAL4, UAS-CD8-GFP/UAS-wit;</i><br><i>wit<sup>A12</sup>/wit<sup>B11</sup></i> | 19.9 $\pm$ 11.8 (n=21); <i>P</i> =0.02**, <i>P</i> =0.15, NSD* | 572.4 $\pm$ 137.2 (n=21); <i>P</i> <0.0001**, <i>P</i> =0.02* |

In *wit* mutants, type III synapses on muscle 12 had significantly fewer boutons and a shorter projection length compared with control animals. Restoration of *wit* function using *Ccap-GAL4* resulted in a full rescue of bouton number and a significant expansion of projection length compared with the control. Mean  $\pm$  s.d.

\*Compared with pertinent control; \*\*compared with mutant; NSD, no significant difference.
